# Supplementary material for: dCas9-Based PDGFR–β Activation ADSCs Accelerate Wound Healing in Diabetic Mice through Angiogenesis and ECM Remodeling
Source: MDPI journal article supplement (doi:10.3390/ijms24065949), 2023-03-21
Supplement: s1 [file s1]

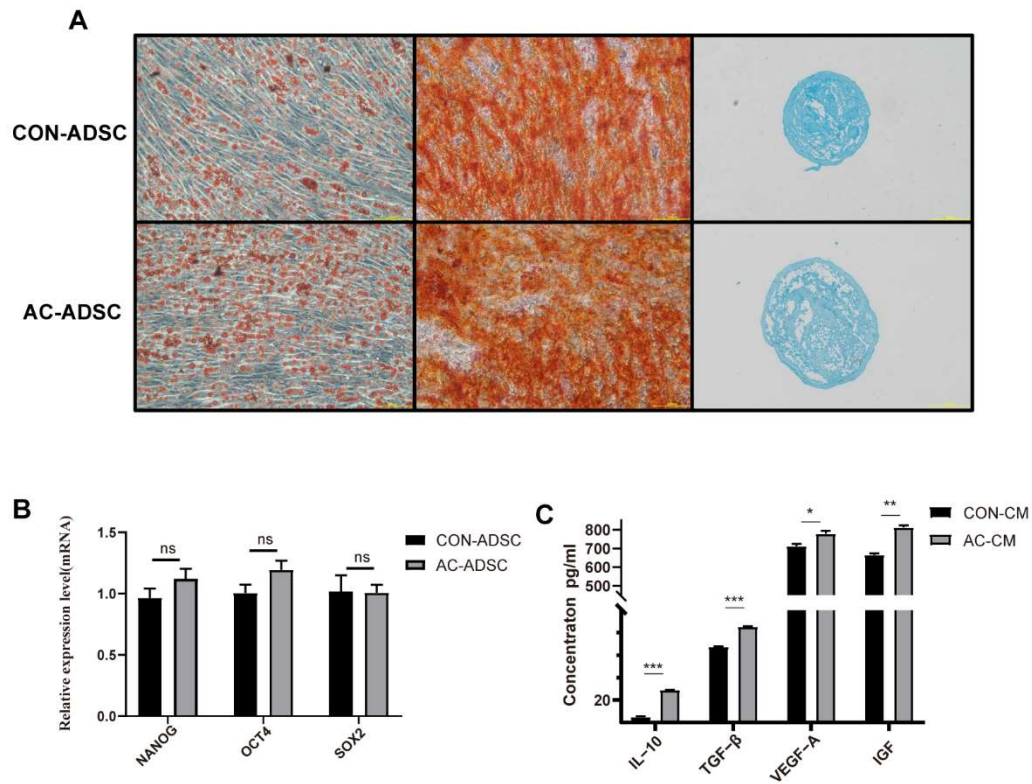

**Supplementary fig S1.** Stemness maintenance and functional changes of ADSCs after endogenous activation of PDGFR- $\beta$ . **(A)** Differentiation potential of MSCs in osteogenic, chondrogenic, and adipogenic lineages using Alizarin red, Alcian blue, and oil red O staining, respectively. **(B)** Expression of *NANOG*, *OCT4*, and *SOX2* detected by RT-qPCR ( $n = 3$ ). **(C)** Concentration of IL-10, TGF- $\beta$ , VEGF-A and IGF of conditioned medium detected by ELISA. Data are shown as mean  $\pm$  SD. Independent-sample t test (two-tailed) was used for statistical comparisons between 2 groups. \*  $p < 0.05$ ; \*\*  $p < 0.01$ ; \*\*\*  $p < 0.001$ .

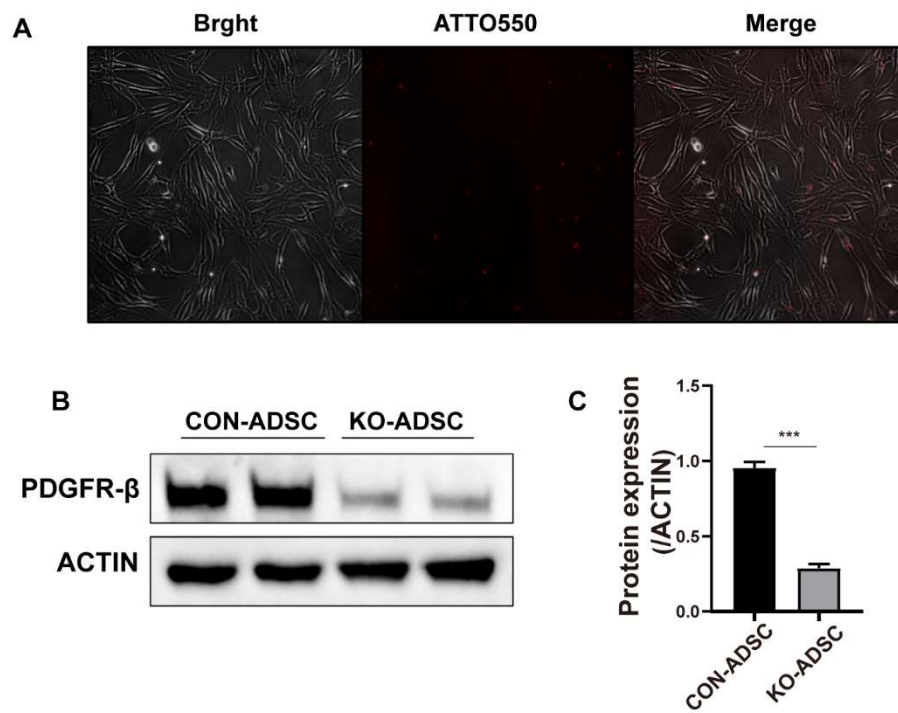

**Supplementary fig S2.** Knock out of PDGFR- $\beta$  in ADSCs. **(A)** Representative single-channel and overlay images of ATTO550<sup>+</sup> ADSCs **(B)** PDGFR- $\beta$  expression and **(C)** levels relative to ACTIN in ADSCs

Supplementary table S1.

| Target gene          | Primer sequence                                   |
|----------------------|---------------------------------------------------|
| mouse- <i>col1a1</i> | CAGAGGCGAAGGCAACA<br>GTCCAAGGGAGCCACATC           |
| mouse- <i>col3a1</i> | AGAACCTGGCCGAGATG<br>TGGACTTCCGGGCATAC            |
| mouse- <i>tgfb</i>   | TGGGGACTTCTTGGCACT<br>ATAGGGGCGTCTGAGGAAC         |
| mouse- <i>actb</i>   | CCTCACTGTCCACCTTCC<br>GGGTGTAAACGCAGCTC           |
| human- <i>LN</i>     | CAGACGCACACGGCTCCTAATC<br>CCTCGCTGACCTCCTGGATAGTG |
| human- <i>VEGFA</i>  | CTGGGCTGTTCTCGCTT<br>CCCCTCTCCTCTTCCTTCT          |
| human- <i>PDGFB</i>  | CACCAACGCCAACTTCC<br>GCTTCTTCCGCACAATCTC          |
| human- <i>ANGPT1</i> | TGCAATATGGATGTCAATGG<br>TATTCACCGGAGGGATTTC       |
| human- <i>bFGF</i>   | AGAAGAGCGACCCTCACATCA<br>CGGTTAGCACACACTCCTTTG    |
| human- <i>HGF</i>    | GCTATCGGGGTAAAGACCTACA<br>CGTAGCGTACCTCTGGATTGC   |
| human- <i>CXCL12</i> | ATTCTCAACACTCCAACTGTGC<br>ACTTTAGCTTCGGGTCAATGC   |
| human- <i>IGF</i>    | GCTCTTCAGTTCGTGTGTGGA<br>GCCTCCTTAGATCACAGCTCC    |

|             |                        |
|-------------|------------------------|
| human-SOX2  | GTGTCAACCTGCATGGC      |
|             | CGAACCATCTCTGTGGTCT    |
| human-NANOG | CGGGACCTTGTCTTCCTT     |
|             | CCCTGATTCTTCCACCAGT    |
| human-OCT4  | CCTGTTCCCCATTCTAGA     |
|             | CTCCTCAGTCCCTTTCCC     |
| human-GAPDH | ACAACTTTGGTATCGTGGAAGG |
|             | GCCATCACGCCACAGTTTC    |

---

Supplementary table S2.

| <b>Antibody</b> | <b>Catalog number</b> | <b>Company</b>            |
|-----------------|-----------------------|---------------------------|
| PDGFR- $\beta$  | ET1605-20             | HUABIO                    |
| PDGFB           | ab178409              | Abcam                     |
| ACTIN           | EM21002               | HUABIO                    |
| GAPDH           | ET1601-4              | HUABIO                    |
| VEGFA           | 66828-1-Ig            | Proteintech               |
| AKT             | ET1609-51             | HUABIO                    |
| p-AKT           | ET1607-73             | HUABIO                    |
| STAT3           | #4904                 | Cell Signaling Technology |
| p-STAT3         | #9145                 | Cell Signaling Technology |
| ERK             | ET1601-29             | HUABIO                    |
| p-ERK           | ET1610-13             | HUABIO                    |
| BCL-2           | ET1702-53             | HUABIO                    |

---
